# Supplementary material for: Ionic-Liquid-Based Aqueous Two-Phase Systems Induced by Intra- and Intermolecular Hydrogen Bonds
Source: MDPI journal article supplement (doi:10.3390/molecules27165307), 2022-08-19
Supplement: s1 [file s1]

## SUPPLEMENTARY MATERIAL

### Ionic-Liquid-Based Aqueous Two-Phase Systems Induced by Intra- and Intermolecular Hydrogen Bonds

*Wenzhuo Xu<sup>1</sup>, Xinpei Gao<sup>2</sup>, Liqiang Zheng<sup>1,\*</sup> and Fei Lu<sup>2,\*</sup>*

<sup>1</sup>Key Laboratory of Colloid and Interface Chemistry, Shandong University, Ministry of Education, Jinan, 250100, P. R. China.

<sup>2</sup>Key Laboratory of Ministry of Education for Advanced Materials in Tropical Island Resources, Hainan University, No 58, Renmin Avenue, Haikou 570228, P. R. China.

#### **Corresponding Author**

\*Fei Lu; E-mail address: [lufei@hainanu.edu.cn](mailto:lufei@hainanu.edu.cn)

\*Liqiang Zheng; E-mail address: [lqzheng@sdu.edu.cn](mailto:lqzheng@sdu.edu.cn)

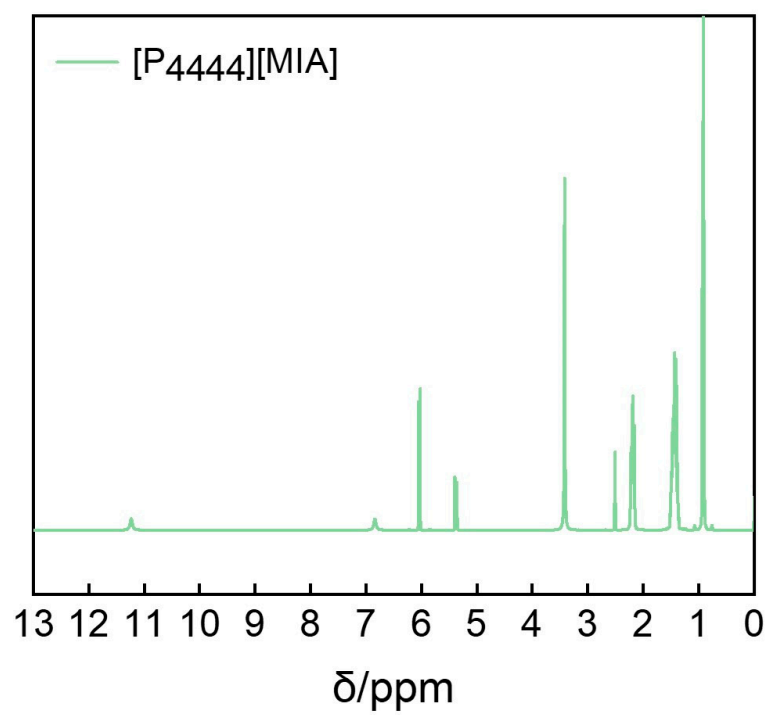

**Figure S1.**  $^1\text{H}$  NMR spectrum of [P<sub>4444</sub>][MIA].

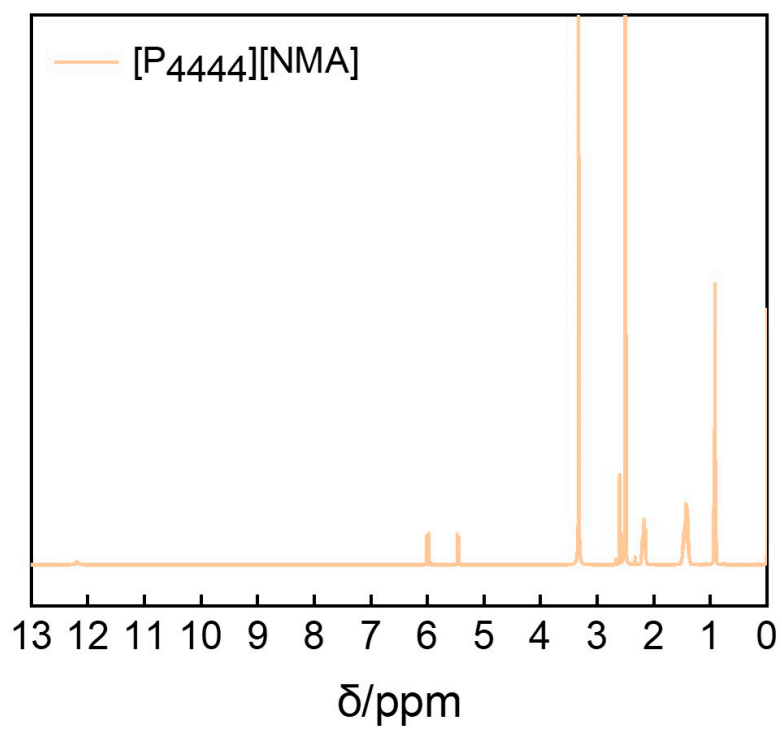

**Figure S2.**  $^1\text{H}$  NMR spectrum of [P<sub>4444</sub>][NMA].

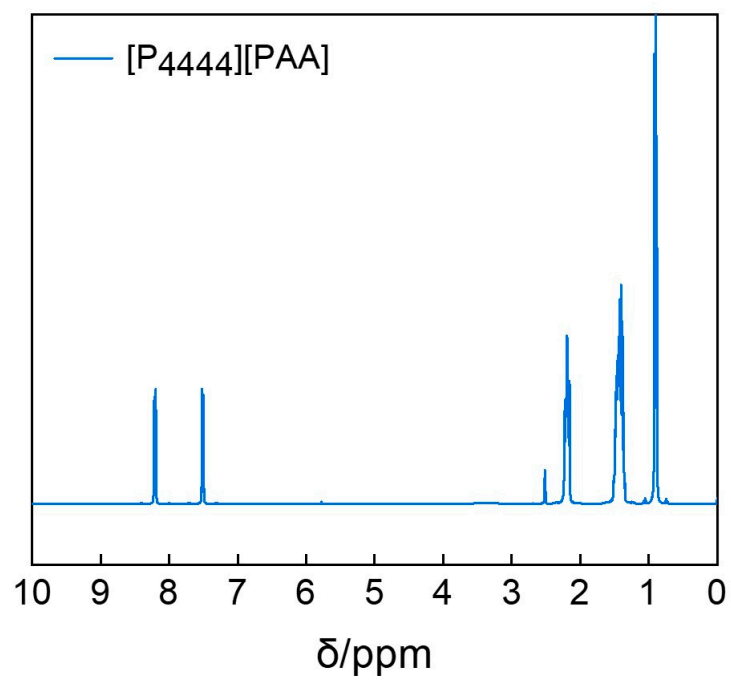

**Figure S3.**  $^1\text{H}$  NMR spectrum of [P<sub>4444</sub>][PAA].

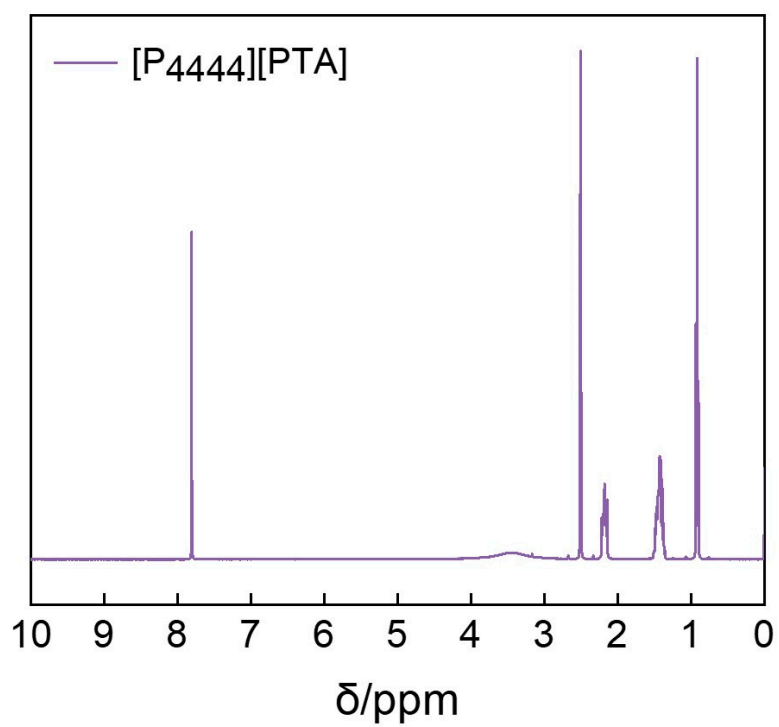

**Figure S4.**  $^1\text{H}$  NMR spectrum of [P<sub>4444</sub>][PTA].

**Table S1.** [P<sub>4444</sub>][fumarate] extracts the relative amounts of amino acids, IL and water used in the experiment (prepare ATPS system with 0.001mol IL and 0.04mol water, add 0.0001mol amino acid).

| Types of amino acids | The water-rich phase          |                       |                          | The IL-rich phase             |                       |                          |
|----------------------|-------------------------------|-----------------------|--------------------------|-------------------------------|-----------------------|--------------------------|
|                      | The amount of amino acid/ mol | The amount of IL/ mol | The amount of water/ mol | The amount of amino acid/ mol | The amount of IL/ mol | The amount of water/ mol |
| Trp                  | $2.81 \times 10^{-6}$         | $7.05 \times 10^{-5}$ | $3.27 \times 10^{-2}$    | $9.72 \times 10^{-5}$         | $9.29 \times 10^{-4}$ | $7.31 \times 10^{-3}$    |
| Ser                  | $2.13 \times 10^{-5}$         | $5.31 \times 10^{-5}$ | $3.06 \times 10^{-2}$    | $7.87 \times 10^{-5}$         | $9.47 \times 10^{-4}$ | $9.45 \times 10^{-3}$    |
| Arg                  | $5.18 \times 10^{-5}$         | $1.24 \times 10^{-4}$ | $2.78 \times 10^{-2}$    | $4.81 \times 10^{-5}$         | $8.76 \times 10^{-4}$ | $1.22 \times 10^{-2}$    |

**Table S2.** [P<sub>4444</sub>][maleate] extracts the relative amounts of amino acids, IL and water used in the experiment (prepare ATPS system with 0.001mol IL and 0.04mol water, add 0.0001mol amino acid).

| Types of amino acids | The water-rich phase          |                       |                          | The IL-rich phase             |                       |                          |
|----------------------|-------------------------------|-----------------------|--------------------------|-------------------------------|-----------------------|--------------------------|
|                      | The amount of amino acid/ mol | The amount of IL/ mol | The amount of water/ mol | The amount of amino acid/ mol | The amount of IL/ mol | The amount of water/ mol |
| Trp                  | $7.08 \times 10^{-5}$         | $1.08 \times 10^{-4}$ | $3.04 \times 10^{-2}$    | $2.92 \times 10^{-5}$         | $8.92 \times 10^{-4}$ | $9.67 \times 10^{-3}$    |
| Ser                  | $4.84 \times 10^{-6}$         | $4.76 \times 10^{-5}$ | $3.76 \times 10^{-2}$    | $9.52 \times 10^{-5}$         | $9.52 \times 10^{-4}$ | $2.43 \times 10^{-3}$    |
| Arg                  | $2.70 \times 10^{-6}$         | $8.63 \times 10^{-5}$ | $3.51 \times 10^{-2}$    | $9.73 \times 10^{-5}$         | $9.14 \times 10^{-4}$ | $4.90 \times 10^{-3}$    |

**Table S3.** The relative amounts of amino acids, IL and water used in the extraction of mixed amino acids by [P<sub>4444</sub>][fumarate] and [P<sub>4444</sub>][maleate] (prepare ATPS system with 0.001mol IL and 0.04mol water, add 0.0001mol amino acid).

| Types of ATPS                               |     | The water-rich phase          |                       |                          | The IL-rich phase             |                       |                          |
|---------------------------------------------|-----|-------------------------------|-----------------------|--------------------------|-------------------------------|-----------------------|--------------------------|
|                                             |     | The amount of amino acid/ mol | The amount of IL/ mol | The amount of water/ mol | The amount of amino acid/ mol | The amount of IL/ mol | The amount of water/ mol |
| [P <sub>4444</sub> ][fumarate]-water system | Ser | 8.67*10 <sup>-5</sup>         | 6.35*10 <sup>-5</sup> | 3.13*10 <sup>-2</sup>    | 1.33*10 <sup>-5</sup>         | 9.36*10 <sup>-4</sup> | 8.74*10 <sup>-3</sup>    |
|                                             | Arg | 3.08*10 <sup>-5</sup>         | 1.39*10 <sup>-4</sup> | 2.73*10 <sup>-2</sup>    | 6.92*10 <sup>-5</sup>         | 8.61*10 <sup>-4</sup> | 1.27*10 <sup>-2</sup>    |
| [P <sub>4444</sub> ][maleate]-water system  | Ser | 9.89*10 <sup>-5</sup>         | 5.48*10 <sup>-5</sup> | 3.63*10 <sup>-2</sup>    | 1.13*10 <sup>-6</sup>         | 9.45*10 <sup>-4</sup> | 3.75*10 <sup>-3</sup>    |
|                                             | Trp | 2.50*10 <sup>-5</sup>         | 8.51*10 <sup>-5</sup> | 3.36*10 <sup>-2</sup>    | 7.50*10 <sup>-5</sup>         | 9.14*10 <sup>-4</sup> | 6.42*10 <sup>-3</sup>    |
